# Supplementary material
Source: HighWire-hosted journal article supplement (https://bmjopen.bmj.com/content/12/12/e066336)

**Appendix Table 1.** Sex-specific estimated VO<sub>2</sub>max (ml/min/kg) in association with all correlates presented in Table 1 to 3.

|                                                | Estimated VO <sub>2</sub> max |                  |       |                  | Low estimated VO <sub>2</sub> max |                  | p-value for interaction |
|------------------------------------------------|-------------------------------|------------------|-------|------------------|-----------------------------------|------------------|-------------------------|
|                                                | Men                           |                  | Women |                  | Men                               | Women            |                         |
| <b>Age</b>                                     | n                             | Median (95% CI)  | n     | Median (95% CI)  | OR <sup>a</sup> (95% CI)          | OR (95% CI)      | p=0.045                 |
| 50-54 years                                    | 906                           | 37.8 (37.3-38.3) | 975   | 31.9 (31.4-32.3) | 1 (ref)                           | 1 (ref)          |                         |
| 55-59 years                                    | 885                           | 36.3 (35.7-36.8) | 927   | 30.5 (30.0-31.0) | 1.49 (1.21-1.84)                  | 1.44 (1.18-1.75) |                         |
| 60-64 years                                    | 799                           | 33.9 (33.6-34.7) | 816   | 28.6 (28.1-29.1) | 2.98 (2.42-3.66)                  | 2.23 (1.83-2.73) |                         |
| <b>Civil status</b>                            |                               |                  |       |                  |                                   |                  |                         |
| Married/Cohabitation                           | 1935                          | 36.5 (36.0-36.8) | 1831  | 30.7 (30.4-31.2) | 1 (ref)                           | 1 (ref)          | p=0.655                 |
| Divorced/Single/Widower                        | 610                           | 35.3 (34.7-36.1) | 851   | 29.7 (29.1-30.2) | 1.43 (1.17-1.73)                  | 1.34 (1.12-1.59) |                         |
| <b>Born in Sweden</b>                          |                               |                  |       |                  |                                   |                  |                         |
| Yes                                            | 2090                          | 36.5 (36.1-36.8) | 2251  | 30.7 (30.4-31.1) | 1 (ref)                           | 1 (ref)          | p=0.633                 |
| No                                             | 472                           | 34.9 (34.1-35.5) | 451   | 28.9 (28.3-29.3) | 1.85 (1.49-2.28)                  | 1.68 (1.36-2.07) |                         |
| <b>Educational level</b>                       |                               |                  |       |                  |                                   |                  |                         |
| University degree                              | 1087                          | 37.5 (37.0-38.0) | 1393  | 31.5 (31.2-32.0) | 1 (ref)                           | 1 (ref)          | p=0.294                 |
| High school/Vocational education               | 1147                          | 35.5 (35.1-35.9) | 1068  | 29.5 (29.1-29.9) | 1.86 (1.54-2.24)                  | 1.83 (1.54-2.18) |                         |
| Elementary school                              | 321                           | 34.0 (33.3-34.8) | 234   | 27.4 (26.5-28.6) | 2.54 (1.95-3.32)                  | 3.21 (2.41-4.28) |                         |
| <b>Employment</b>                              |                               |                  |       |                  |                                   |                  |                         |
| Working, ≥ 50% of full-time                    | 2117                          | 36.7 (36.5-37.0) | 2225  | 31.0 (30.6-31.4) | 1 (ref)                           | 1 (ref)          | p=0.574                 |
| Retired                                        | 123                           | 33.3 (32.1-34.7) | 108   | 27.6 (26.6-29.0) | 1.48 (1.01-2.19)                  | 1.60 (1.07-2.41) |                         |
| Disability pension/Sickness pension/Sick leave | 115                           | 33.7 (32.9-34.8) | 184   | 26.7 (26.0-28.0) | 2.16 (1.47-3.18)                  | 2.91 (2.14-3.97) |                         |
| Unemployed/Student                             | 191                           | 33.6 (32.6-34.5) | 174   | 29.3 (28.4-30.1) | 2.27 (1.67-3.09)                  | 1.53 (1.11-2.11) |                         |

**Financial strain**

|     |      |                  |      |                  |                  |                  |         |
|-----|------|------------------|------|------------------|------------------|------------------|---------|
| No  | 2328 | 36.5 (36.1-36.8) | 2431 | 30.7 (30.1-31.1) | 1 (ref)          | 1 (ref)          | p=0.293 |
| Yes | 177  | 33.0 (31.9-34.3) | 229  | 28.0 (26.9-28.7) | 2.91 (2.11-4.00) | 2.24 (1.69-2.96) |         |

**Smoking habits**

|                          |      |                  |      |                  |                  |                  |         |
|--------------------------|------|------------------|------|------------------|------------------|------------------|---------|
| Never smoker             | 1287 | 37.3 (36.8-37.9) | 1176 | 31.4 (31.0-31.8) | 1 (ref)          | 1 (ref)          | p=0.004 |
| Ex-smoker                | 897  | 35.0 (34.6-35.5) | 1118 | 29.9 (29.3-30.3) | 1.65 (1.37-1.99) | 1.17 (0.98-1.39) |         |
| Regular smoker/Sometimes | 341  | 35.1 (34.0-36.1) | 375  | 29.9 (29.3-30.3) | 2.02 (1.57-2.60) | 1.28 (0.99-1.64) |         |

**Pack-years**

|                                         |      |                  |      |                  |                  |                  |         |
|-----------------------------------------|------|------------------|------|------------------|------------------|------------------|---------|
| Never smokers (0)                       | 1287 | 37.3 (36.8-37.9) | 1176 | 31.4 (31.0-31.8) | 1 (ref)          | 1 (ref)          | p=0.008 |
| Former smokers, low (<15 pack-years)    | 500  | 36.1 (35.4-36.7) | 720  | 30.5 (30.1-31.1) | 1.13 (0.90-1.43) | 0.89 (0.73-1.09) |         |
| Former smokers, heavy (≥15 pack-years)  | 397  | 33.4 (33.1-34.3) | 398  | 28.1 (27.6-29.1) | 2.57 (2.03-3.27) | 1.82 (1.43-2.30) |         |
| Current smokers, low (<15 pack-years)   | 106  | 36.5 (34.8-37.6) | 120  | 31.6 (30.0-32.9) | 1.57 (1.02-2.40) | 0.79 (0.51-1.22) |         |
| Current smokers, heavy (≥15 pack-years) | 235  | 34.8 (33.6-35.6) | 255  | 29.3 (28.3-29.9) | 2.26 (1.69-3.02) | 1.56 (1.18-2.07) |         |

**Alcohol abuse**

|          |      |                  |      |                  |                  |                   |         |
|----------|------|------------------|------|------------------|------------------|-------------------|---------|
| No/Low   | 1881 | 36.6 (36.3-36.9) | 2067 | 31.0 (30.5-31.3) | 1 (ref)          | 1 (ref)           | p=0.226 |
| Moderate | 355  | 35.4 (34.8-36.4) | 284  | 30.8 (30.1-31.3) | 1.43 (1.12-1.82) | 1.08 (0.82-1.42)  |         |
| High     | 22   | 33.7 (31.1-35.0) | 11   | 27.3 (24.6-33.3) | 2.72 (1.13-6.50) | 3.92 (1.18-13.04) |         |

**Sleep**

|                              |      |                  |      |                  |                  |                  |         |
|------------------------------|------|------------------|------|------------------|------------------|------------------|---------|
| Very well/well               | 1348 | 36.7 (36.2-37.0) | 1053 | 30.8 (30.3-31.4) | 1 (ref)          | 1 (ref)          | p=0.253 |
| Rather well/Badly/Very badly | 1198 | 35.7 (35.4-36.1) | 1637 | 30.2 (29.9-30.5) | 1.31 (1.11-1.56) | 1.14 (0.97-1.35) |         |

**Stress**

|                                           |      |                  |      |                  |                  |                  |         |
|-------------------------------------------|------|------------------|------|------------------|------------------|------------------|---------|
| No stress/Some stress during last 5 years | 2140 | 36.3 (35.9-36.7) | 1949 | 30.5 (30.3-31.0) | 1 (ref)          | 1 (ref)          | p=0.267 |
| Constant stress last 1 to 5 years         | 400  | 35.6 (35.1-36.6) | 729  | 29.9 (29.4-30.6) | 1.14 (0.91-1.44) | 1.32 (1.10-1.58) |         |

**At work I feel that that I have control in most situations**

|                                          |      |                  |      |                  |                  |                  |         |
|------------------------------------------|------|------------------|------|------------------|------------------|------------------|---------|
| Strongly agree/Agree                     | 1993 | 36.5 (36.1-36.8) | 1853 | 30.8 (30.4-31.2) | 1 (ref)          | 1 (ref)          | p=0.730 |
| Neutral/Do not agree/Do not agree at all | 444  | 35.9 (35.1-36.6) | 667  | 30.1 (29.5-30.9) | 1.20 (0.96-1.50) | 1.25 (1.04-1.51) |         |

**I feel that what happens in my life is often determined by factors beyond my control**

|                                  |      |                  |      |                  |                  |                  |         |
|----------------------------------|------|------------------|------|------------------|------------------|------------------|---------|
| Do not agree at all/Do not agree | 1489 | 36.5 (36.1-36.9) | 1487 | 31.3 (30.9-31.7) | 1 (ref)          | 1 (ref)          | p=0.004 |
| Neutral/Agree/Strongly agree     | 1022 | 35.9 (35.4-36.4) | 1171 | 29.3 (28.9-29.7) | 1.22 (1.03-1.45) | 1.72 (1.45-2.02) |         |

**General health**

|                     |      |                  |      |                  |                  |                  |         |
|---------------------|------|------------------|------|------------------|------------------|------------------|---------|
| Excellent/Very good | 1281 | 38.0 (37.5-38.3) | 1417 | 32.1 (31.8-32.6) | 1 (ref)          | 1 (ref)          | p=0.116 |
| Good                | 966  | 34.9 (34.5-35.4) | 852  | 29.1 (28.6-29.7) | 2.31 (1.91-2.79) | 2.52 (2.08-3.04) |         |
| Somewhat bad/Bad    | 300  | 33.3 (32.3-34.0) | 429  | 26.4 (25.7-27.3) | 4.13 (3.15-5.41) | 5.40 (4.27-6.83) |         |

**BMI and estVO<sub>2</sub>max in L·min<sup>-1</sup>**

|           |      |                  |      |                  |                  |                   |         |
|-----------|------|------------------|------|------------------|------------------|-------------------|---------|
| <24.9     | 748  | 3.07 (3.03-3.12) | 1288 | 2.16 (2.14-2.18) | 1 (ref)          | 1 (ref)           | p=0.001 |
| 25.0-29.9 | 1391 | 3.16 (3.13-3.19) | 950  | 2.14 (2.12-2.17) | 1.87 (1.46-2.40) | 2.70 (2.11-3.45)  |         |
| 30.0-34.9 | 379  | 3.21 (3.16-3.27) | 349  | 2.18 (2.13-2.23) | 4.15 (2.70-6.37) | 7.36 (4.85-11.17) |         |
| ≥35       | 72   | 3.18 (3.06-3.30) | 131  | 2.20 (2.10-2.25) | 12.7 (5.7-28.3)  | 18.2 (9.63-34.3)  |         |

**Waist circumference**

|                                       |      |                  |      |                  |                  |                  |         |
|---------------------------------------|------|------------------|------|------------------|------------------|------------------|---------|
| Low waist (<88 cm women, <102 cm men) | 1725 | 38.5 (38.2-38.9) | 1466 | 34.0 (33.6-34.4) | 1 (ref)          | 1 (ref)          | p=0.041 |
| High waist (≥88 cm women, ≥102cm men) | 863  | 32.0 (31.6-32.5) | 1251 | 26.7 (26.4-27.0) | 9.15 (7.52-11.1) | 11.5 (9.44-14.1) |         |

**Depression symptoms**

|     |      |                  |      |                  |                  |                  |         |
|-----|------|------------------|------|------------------|------------------|------------------|---------|
| No  | 2003 | 36.3 (35.9-36.7) | 1684 | 30.8 (30.4-31.3) | 1 (ref)          | 1 (ref)          | p=0.230 |
| Yes | 519  | 36.0 (35.4-36.6) | 976  | 29.9 (29.3-30.2) | 1.21 (0.99-1.50) | 1.41 (1.19-1.67) |         |

**Chronic conditions\***

|     |      |                  |      |                  |                  |                  |         |
|-----|------|------------------|------|------------------|------------------|------------------|---------|
| 0   | 1693 | 36.8 (36.4-37.1) | 1772 | 31.1 (30.7-31.4) | 1 (ref)          | 1 (ref)          | p=0.186 |
| 1-2 | 816  | 35.1 (34.7-35.7) | 889  | 29.3 (28.8-29.9) | 1.30 (1.09-1.56) | 1.46 (1.23-1.74) |         |

|                                              |      |                  |      |                  |                  |                  |         |
|----------------------------------------------|------|------------------|------|------------------|------------------|------------------|---------|
| =>3                                          | 81   | 34.0 (32.7-35.3) | 57   | 23.8 (22.6-29.1) | 1.62 (1.02-2.56) | 2.92 (1.70-5.03) |         |
| <b>CVD, Hypertension and/or Lung disease</b> |      |                  |      |                  |                  |                  |         |
| No                                           | 1980 | 36.6 (36.2-36.9) | 2089 | 31.0 (30.5-31.3) | 1 (ref)          | 1 (ref)          | p=0.142 |
| Yes                                          | 610  | 35.0 (34.6-35.6) | 629  | 28.8 (28.3-29.4) | 1.26 (1.04-1.53) | 1.58 (1.31-1.90) |         |
| <b>Commuting*</b>                            |      |                  |      |                  |                  |                  |         |
| No active commuting                          | 1638 | 35.4 (35.1-35.8) | 1419 | 29.9 (29.5-30.3) | 1 (ref)          | 1 (ref)          | p=0.831 |
| Partly commuter, bike                        | 270  | 38.6 (37.7-39.1) | 401  | 32.1 (31.6-33.0) | 0.35 (0.25-0.48) | 0.45 (0.34-0.58) |         |
| Partly commuter, walking                     | 68   | 34.5 (32.7-35.8) | 128  | 28.9 (28.1-29.8) | 1.42 (0.86-2.33) | 0.99 (0.68-1.44) |         |
| Partly commuter, mix                         | 3    | 44.2 (38.1-50.9) | 16   | 29.8 (28.2-33.2) | -                | 0.57 (0.18-1.79) |         |
| All year commuter, bike                      | 203  | 41.3 (40.5-42.4) | 204  | 35.0 (34.2-36.2) | 0.23 (0.15-0.35) | 0.14 (0.08-0.23) |         |
| All year commuter, walking                   | 162  | 36.9 (35.6-38.1) | 253  | 30.3 (29.7-31.3) | 0.79 (0.56-1.12) | 0.66 (0.49-0.89) |         |
| All year commuter, mix                       | 8    | 40.2 (36.8-41.1) | 22   | 32.3 (29.0-36.1) | 0.26 (0.03-2.18) | 0.61 (0.24-1.59) |         |
| <b>Physical working situation</b>            |      |                  |      |                  |                  |                  |         |
| Sedentary to light                           | 1894 | 36.7 (36.3-37.0) | 2027 | 31.0 (30.5-31.4) | 1 (ref)          | 1 (ref)          | p=0.775 |
| Sometimes to frequently heavy                | 498  | 35.3 (34.8-36.1) | 447  | 29.8 (29.1-30.4) | 1.48 (1.20-1.83) | 1.40 (1.12-1.74) |         |
| <b>Exercise habits</b>                       |      |                  |      |                  |                  |                  |         |
| Never                                        | 722  | 33.7 (33.4-34.1) | 662  | 27.4 (26.7-28.0) | 1 (ref)          | 1 (ref)          | p=0.333 |
| Irregular                                    | 496  | 34.8 (34.0-35.3) | 571  | 28.7 (28.2-29.3) | 0.78 (0.62-0.99) | 0.71 (0.57-0.90) |         |
| 1-2 times per week                           | 456  | 36.7 (36.1-37.3) | 576  | 30.7 (30.3-31.4) | 0.35 (0.27-0.46) | 0.34 (0.26-0.43) |         |
| 2-3 times per week                           | 507  | 37.9 (37.2-38.5) | 582  | 33.0 (32.3-33.6) | 0.29 (0.22-0.38) | 0.22 (0.17-0.28) |         |
| >3 times per week                            | 356  | 40.5 (39.7-41.0) | 293  | 35.4 (34.6-36.2) | 0.14 (0.10-0.20) | 0.14 (0.10-0.21) |         |
| <b>Total physical activity</b>               |      |                  |      |                  |                  |                  |         |
| Sedentary                                    | 315  | 32.4 (31.5-33.2) | 225  | 25.5 (24.5-26.5) | 1 (ref)          | 1 (ref)          | p=0.021 |
| Light                                        | 1098 | 34.9 (34.6-35.3) | 1268 | 28.8 (28.4-29.1) | 0.42 (0.32-0.55) | 0.34 (0.25-0.46) |         |

|                                                                    |     |                  |     |                  |                  |                  |         |
|--------------------------------------------------------------------|-----|------------------|-----|------------------|------------------|------------------|---------|
| Moderate                                                           | 735 | 37.4 (37.0-38.2) | 878 | 32.7 (32.2-33.2) | 0.18 (0.14-0.25) | 0.10 (0.07-0.14) |         |
| Regular exercise/training                                          | 367 | 40.9 (40.1-41.5) | 302 | 35.6 (35.0-36.2) | 0.06 (0.04-0.10) | 0.06 (0.04-0.09) |         |
| <b>Leisure time sitting</b>                                        |     |                  |     |                  |                  |                  |         |
| Q1; <4 h per day                                                   | 525 | 37.5 (37.0-38.1) | 596 | 30.9 (30.1-31.7) | 1 (ref)          | 1 (ref)          | p=0.159 |
| Q2; 4-6 h per day                                                  | 499 | 36.2 (35.7-37.0) | 540 | 30.8 (30.1-31.4) | 1.29 (0.98-1.69) | 1.19 (0.92-1.54) |         |
| Q3; 6-8.5 h per day                                                | 438 | 36.9 (36.1-37.9) | 487 | 31.3 (30.5-32.0) | 1.06 (0.79-1.41) | 1.16 (0.88-1.52) |         |
| Q4; >8.5 h per day                                                 | 527 | 36.3 (35.6-37.0) | 431 | 30.3 (29.9-31.2) | 1.18 (0.89-1.55) | 1.46 (1.11-1.93) |         |
| <b>% of time spent in Sedentary</b>                                |     |                  |     |                  |                  |                  |         |
| Q1; <47%                                                           | 462 | 37.5 (36.8-38.1) | 805 | 31.9 (31.1-32.3) | 1 (ref)          | 1 (ref)          | p=0.033 |
| Q2; 47%-54%                                                        | 539 | 37.1 (36.6-37.7) | 726 | 30.8 (30.2-31.4) | 1.11 (0.83-1.48) | 1.23 (0.97-1.54) |         |
| Q3; 54%-61%                                                        | 650 | 36.4 (35.8-37.0) | 616 | 30.1 (29.5-30.7) | 1.30 (0.99-1.71) | 1.66 (1.31-2.09) |         |
| Q4; >61%                                                           | 803 | 34.8 (34.3-35.5) | 464 | 27.9 (27.3-28.4) | 1.97 (1.52-2.55) | 3.01 (2.35-3.85) |         |
| <b>% of time spent in prolonged Sedentary (of total wear time)</b> |     |                  |     |                  |                  |                  |         |
| Q1; <13%                                                           | 474 | 37.6 (37.0-38.2) | 792 | 31.7 (30.8-32.2) | 1 (ref)          | 1 (ref)          | p=0.210 |
| Q2; 13%-19%                                                        | 536 | 37.2 (36.6-37.6) | 731 | 31.1 (30.5-31.7) | 1.24 (0.93-1.66) | 1.08 (0.86-1.35) |         |
| Q3; 19%-26%                                                        | 673 | 36.1 (35.5-36.7) | 592 | 30.1 (29.5-30.5) | 1.55 (1.18-2.03) | 1.64 (1.30-2.07) |         |
| Q4; >26%                                                           | 771 | 34.9 (34.4-35.5) | 496 | 28.1 (27.7-28.6) | 2.00 (1.54-2.60) | 2.42 (1.90-3.08) |         |
| <b>% of time spent in Light physical activity</b>                  |     |                  |     |                  |                  |                  |         |
| Q1; <33%                                                           | 840 | 35.4 (34.8-35.8) | 427 | 28.6 (27.9-29.7) | 1 (ref)          | 1 (ref)          | p=0.124 |
| Q2; 33%-40%                                                        | 629 | 36.1 (35.5-36.7) | 637 | 30.3 (29.8-31.0) | 0.87 (0.70-1.09) | 0.66 (0.51-0.85) |         |
| Q3; 40%-46%                                                        | 542 | 37.1 (36.7-37.8) | 723 | 30.6 (30.0-31.2) | 0.64 (0.50-0.81) | 0.53 (0.41-0.69) |         |
| Q4; >46%                                                           | 443 | 37.0 (36.4-37.6) | 824 | 31.0 (30.5-31.8) | 0.67 (0.52-0.86) | 0.46 (0.36-0.59) |         |
| <b>% of time spent in Moderate physical activity</b>               |     |                  |     |                  |                  |                  |         |
| Q1; <3.8%                                                          | 655 | 34.7 (34.1-35.3) | 612 | 28.3 (27.7-28.9) | 1 (ref)          | 1 (ref)          | p=0.062 |

|                                                      |     |                  |     |                  |                  |                  |         |
|------------------------------------------------------|-----|------------------|-----|------------------|------------------|------------------|---------|
| Q2; 3.8%-5.3%                                        | 581 | 36.4 (35.7-37.0) | 684 | 30.1 (29.7-30.7) | 0.61 (0.48-0.78) | 0.61 (0.49-0.77) |         |
| Q3; 5.3%-7.2%                                        | 594 | 37.0 (36.2-37.7) | 672 | 31.0 (30.3-31.5) | 0.56 (0.44-0.71) | 0.48 (0.38-0.61) |         |
| Q4; >7.2%                                            | 624 | 37.2 (36.7-37.9) | 643 | 32.1 (31.3-32.5) | 0.51 (0.40-0.65) | 0.38 (0.30-0.48) |         |
| <b>% of time spent in Vigorous physical activity</b> |     |                  |     |                  |                  |                  |         |
| Q1; <0.02%                                           | 557 | 33.7 (33.3-34.2) | 709 | 28.0 (27.4-28.5) | 1 (ref)          | 1 (ref)          | p=0.060 |
| Q2; 0.02%-0.1%                                       | 566 | 34.9 (34.1-35.6) | 700 | 28.7 (28.2-29.4) | 0.79 (0.62-1.00) | 0.82 (0.67-1.02) |         |
| Q3; 0.1%-0.6%                                        | 640 | 37.1 (36.6-37.6) | 627 | 31.4 (31.0-31.9) | 0.37 (0.29-0.47) | 0.31 (0.25-0.40) |         |
| Q4; >0.6%                                            | 691 | 38.7 (38.1-39.4) | 575 | 34.7 (33.9-35.3) | 0.26 (0.20-0.33) | 0.17 (0.13-0.23) |         |

<sup>a</sup> Adjusted for sex and age, comparing the lowest sex-specific tertile of estimated VO<sub>2</sub>max with the two higher tertiles

<sup>#</sup> Sex-specific tertiles based on L/min. Analyses additionally adjusted for weight in kg.

**Appendix Figure 1.** Association between continuous levels of estimated VO<sub>2</sub>max, BMI and waist circumference.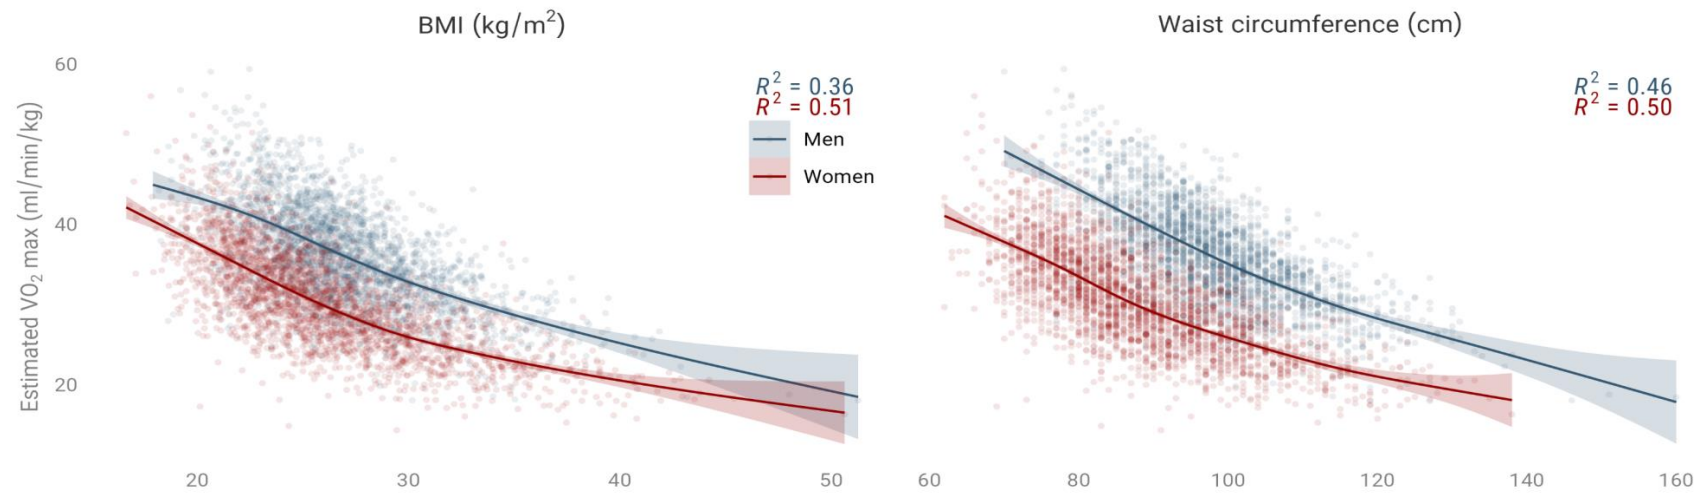

**Appendix Figure 2.** Association between estimated VO<sub>2</sub>max and continuous levels of accelerometer assessed sedentary time and physical activity of different intensities.

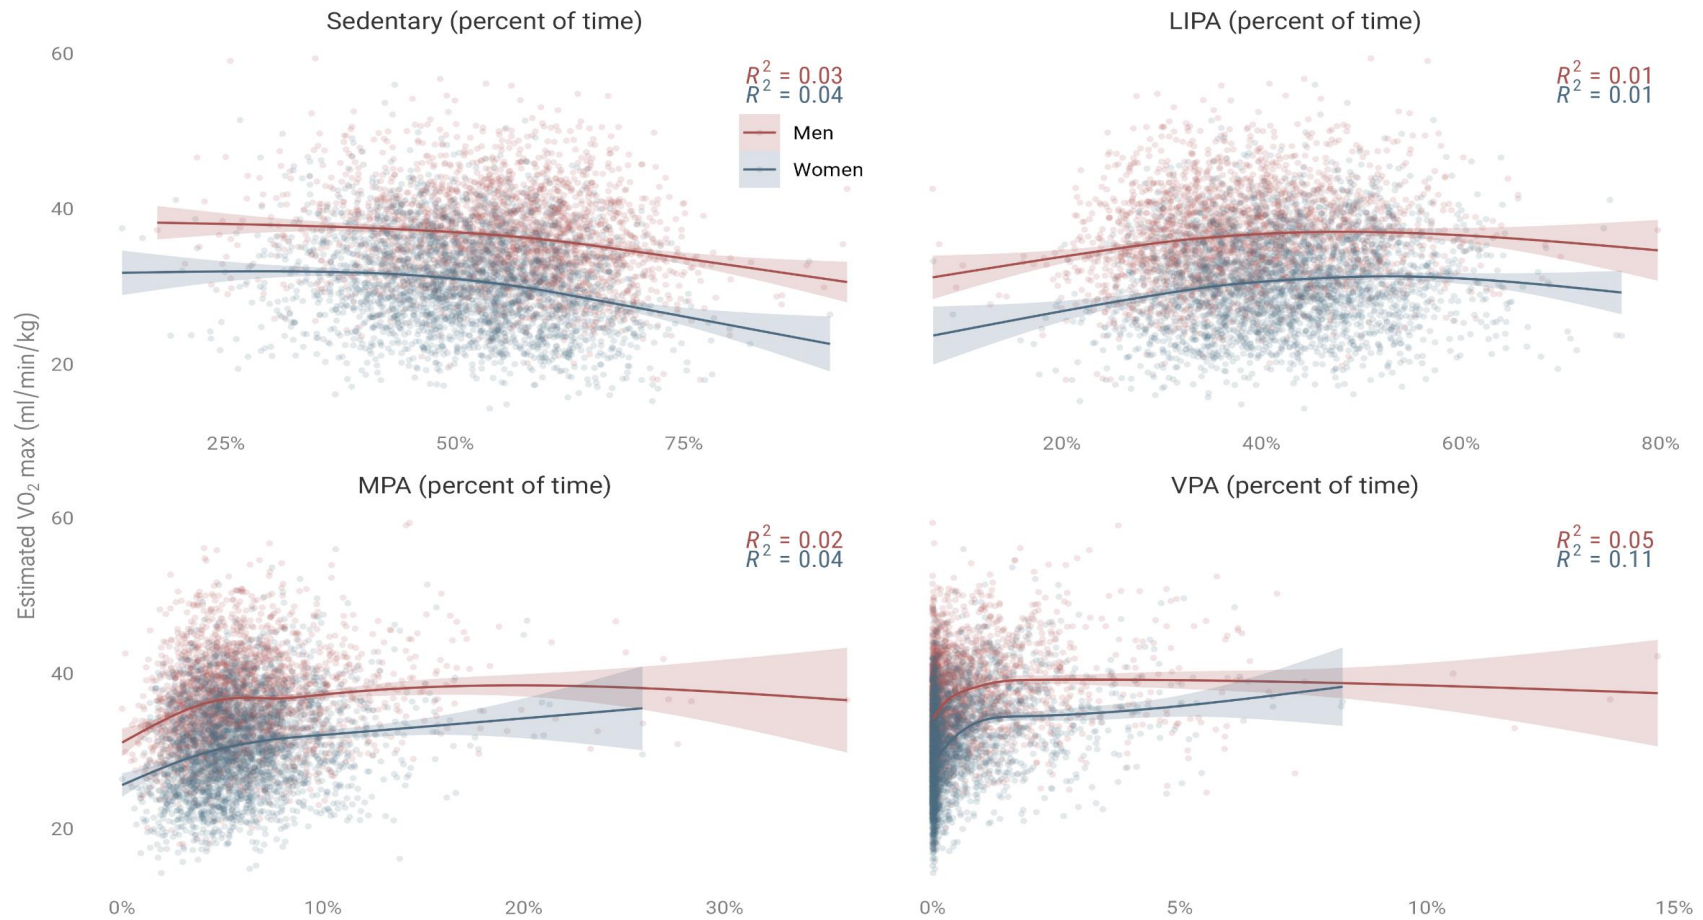

Supplement: inline-supplementary-material-2 [file inline-supplementary-material-2.pdf]
